# Supplementary material for: ERK/MAPK signaling is essential for intestinal development through Wnt pathway modulation
Source: Oxford University Press journal article supplement (doi:10.1242/dev.185678), 2020-01-01
Supplement: dev185678supp.pdf [file dev185678supp.pdf]

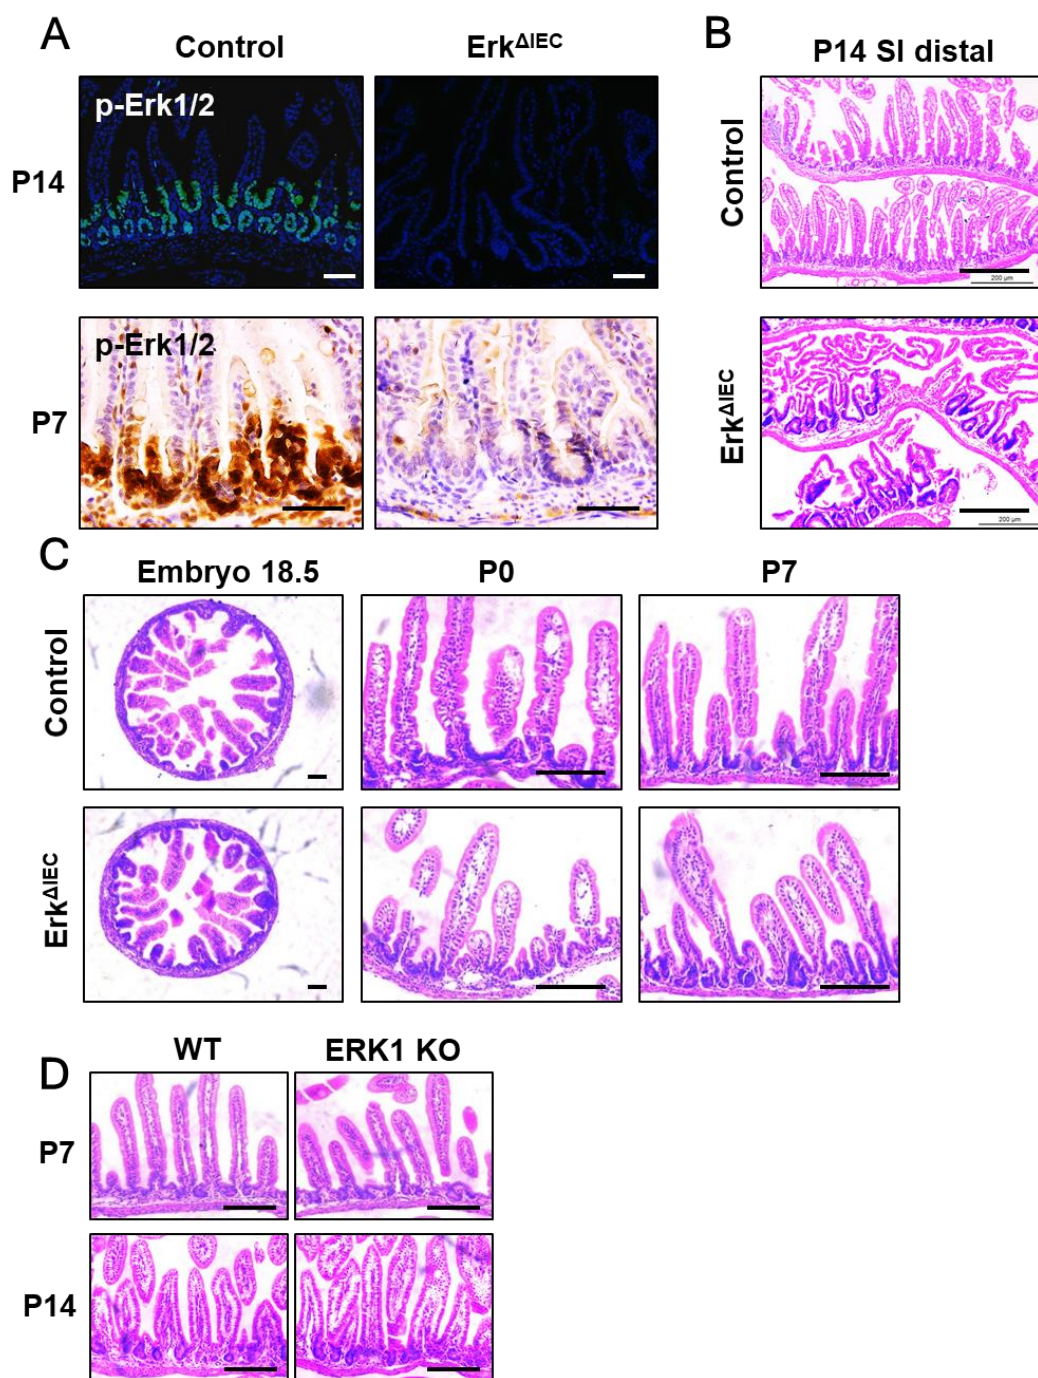

**Figure S1:** Analysis of intestinal morphology at different time points.

(A) Immunostaining for p-Erk1/2 in intestines of control and Erk<sup>ΔIEC</sup> littermates at P14 and P7. (B) H&E staining of small intestine distal part from control and Erk<sup>ΔIEC</sup> littermates at P14. (C) H&E staining of small intestine from control and Erk<sup>ΔIEC</sup> littermates at Embryo day 18.5 and postnatal day 0 and day 7. (D) H&E staining of small intestine (SI) from WT and Erk1 KO littermates at P7 and P14.

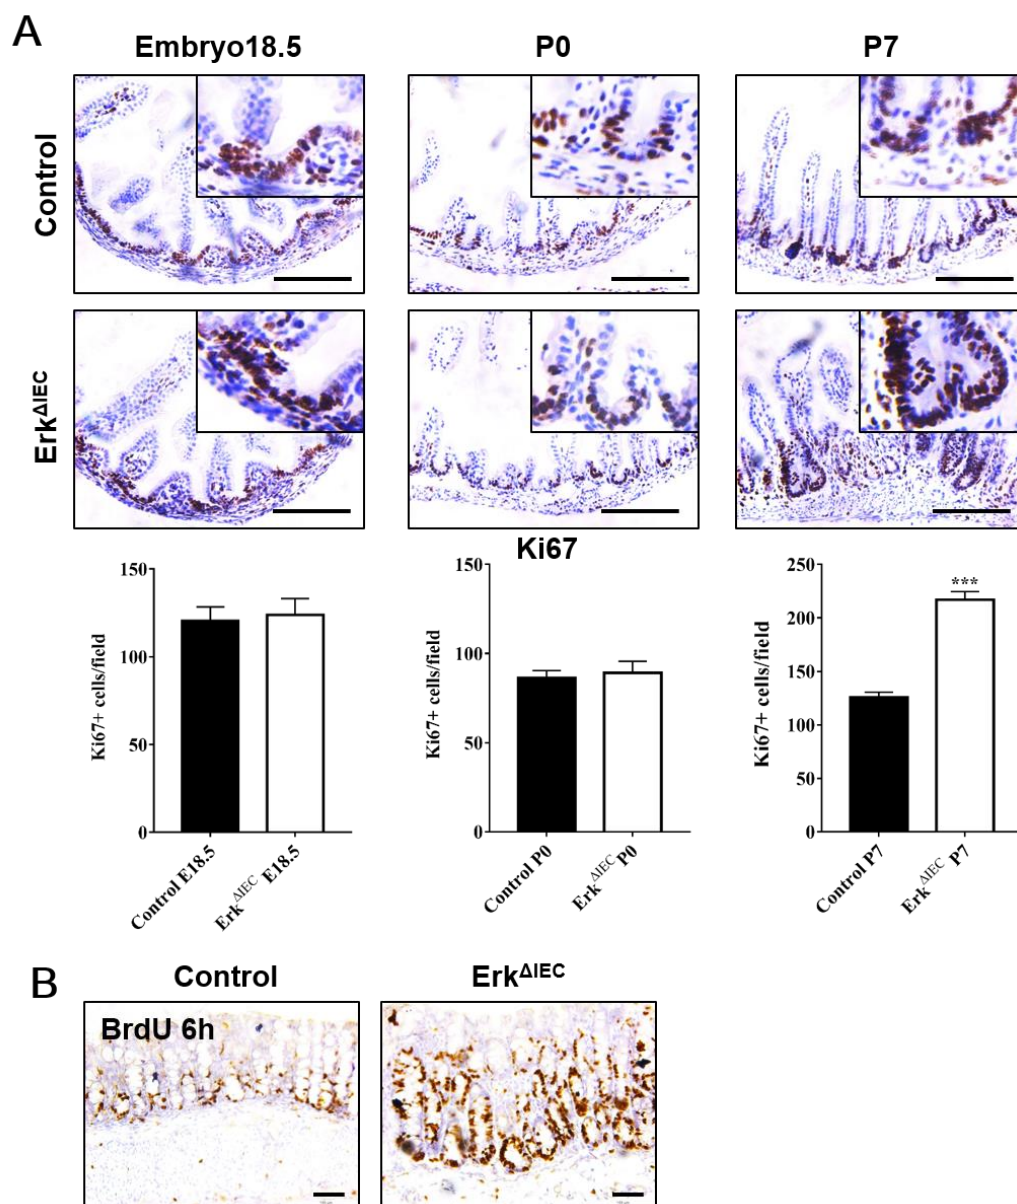

**Figure S2:** Analysis of cell proliferation at different time points. (A)

Immunohistochemistry staining with antibody against Ki67 and quantification in small intestines of control and Erk<sup>ΔIEC</sup> littermates at Embryo day 18.5 and postnatal day 0 and day7 (n=3). (B) BrdU was injected into two-week old control and Erk<sup>ΔIEC</sup> littermates, and the intestinal tissues were harvested 6 hours after injection. BrdU incorporated cells were visualized via immunohistochemical staining. (Scale bars: 100 $\mu$ m)

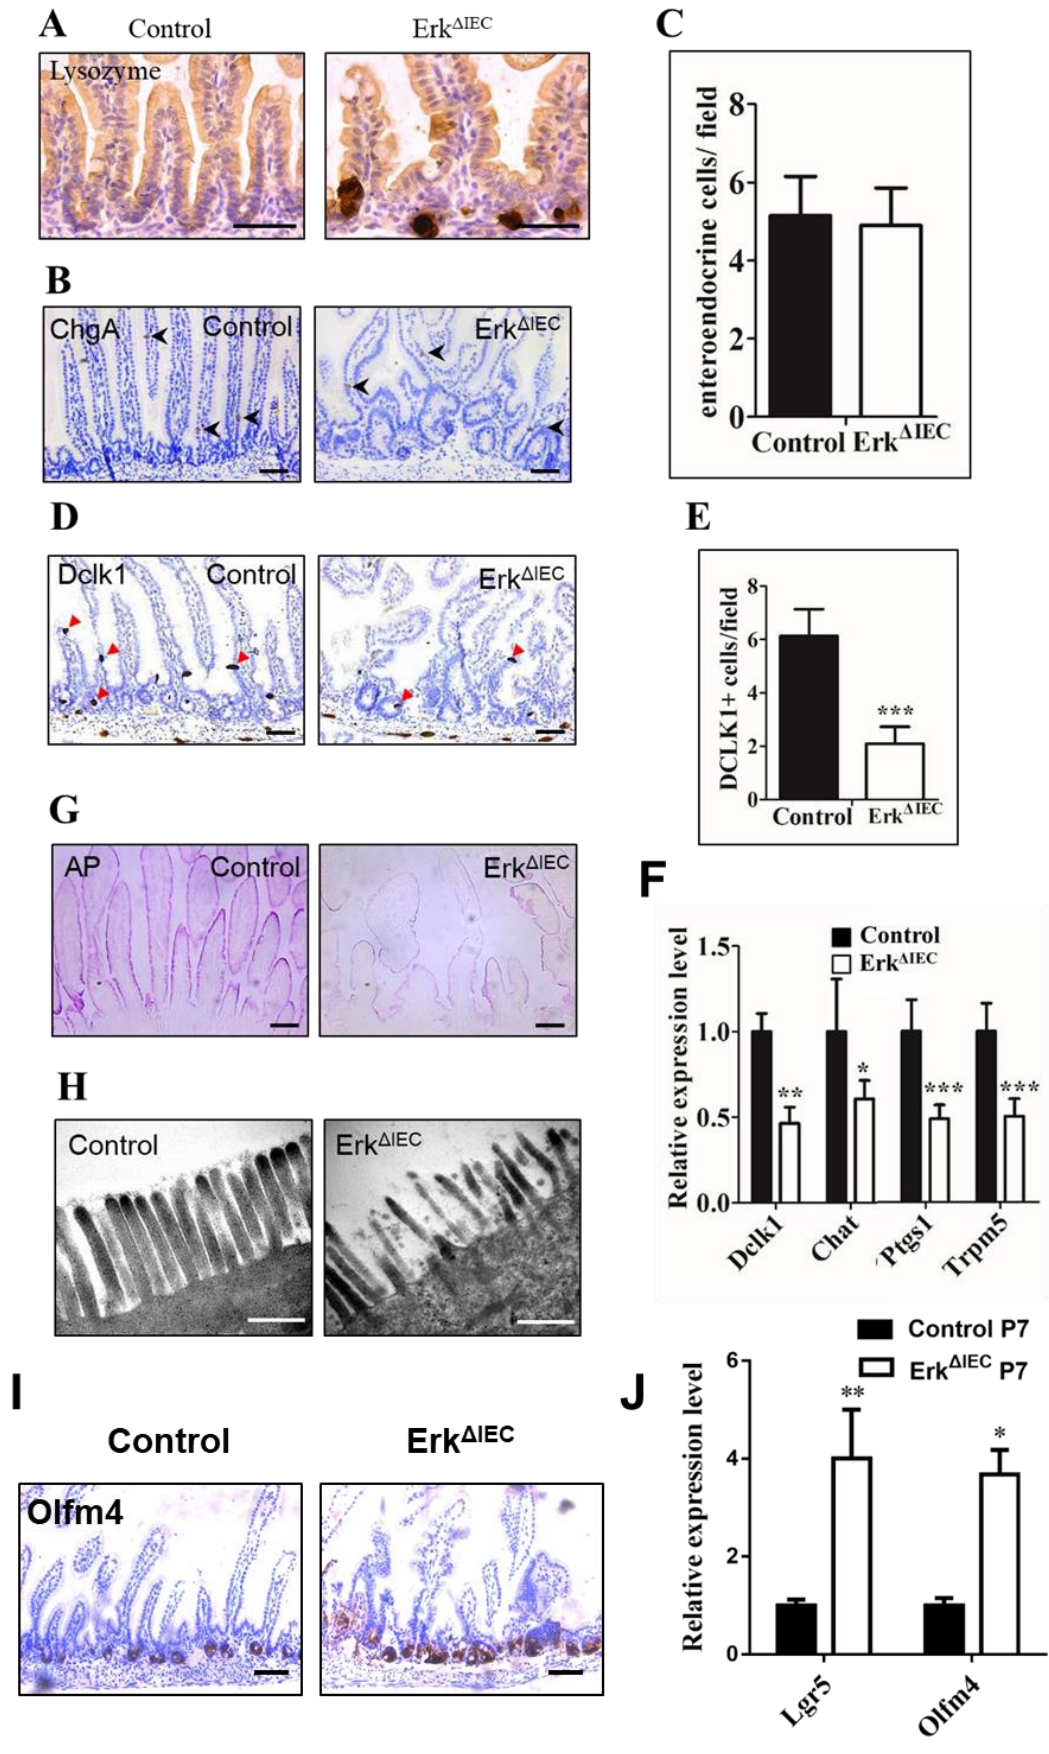

**Figure S3:** Erk1/2 in intestinal epithelial cells regulated cell differentiation **(A)** Paneth cells in control and Erk1/2 mutant small intestine were stained with Lysozyme specific antibody at P6. **(B)** Staining of enteroendocrine cells for Chromogranin A (ChgA) in control and Erk1/2 mutant small intestines at P14. Arrowheads: ChgA positive cells. **(C)** Quantification of Chromogranin A-positive cells in small intestines of control and Erk mutant mice at P14 (n=3). **(D)** The number of Dclk1-positive tuft cells was decreased in Erk1/2 mutant intestines compared with control intestines. Arrowheads: Dclk1 positive signals. **(E)** Quantification of Dclk1- positive cells in small intestines of control and Erk mutant mice at P14 (n=3). **(F)** qRT- PCR analysis of mRNA levels of Tuft cell specific genes in small intestines of control and Erk mutant mice at P14. Data are mean  $\pm$  SEM (n=3, \*P<0.05; \*\*P<0.01). **(G)** Alkaline phosphatase (AP) positive enterocytes are immature in Erk1/2 deficient small intestines at P14. **(H)** The brush border of Erk1/2 deficient enterocytes is disrupted. The images of small intestinal tissues from control and Erk <sup>$\Delta$ IEC</sup> littermates were obtained by transmission electron microscopy. **(I)** Stem cells in control and Erk1/2 mutant small intestine were stained with Olfm4 specific antibody at P7. **(J)** qRT- PCR analysis of mRNA levels of stem cells specific genes in small intestines of control and Erk mutant mice at P7. Data are mean  $\pm$  SEM (n=3, \*P<0.05; \*\*P<0.01). (Scale bars: 50 $\mu$ m except 0.5 $\mu$ m in H).

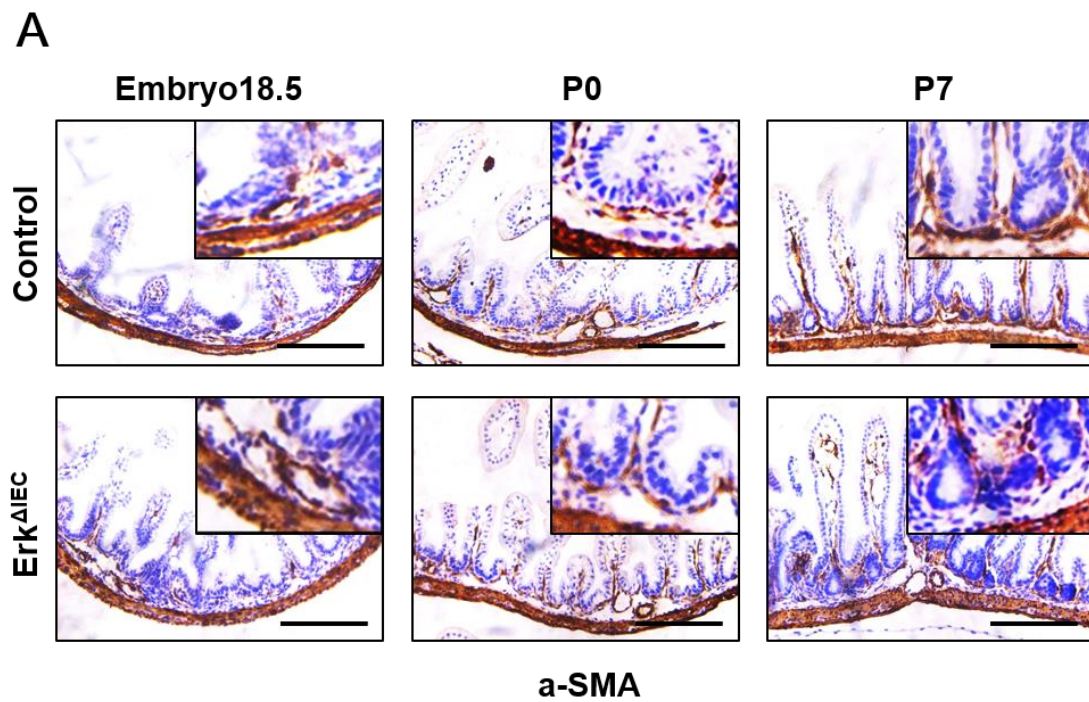

**Figure S4:** (A) Immunohistochemistry staining with antibody against a-SMA in intestines of control and Erk<sup>ΔIEC</sup> littermates at Embryo day 18.5 and postnatal day 0 and day 7. (Scale bars: 100µm)

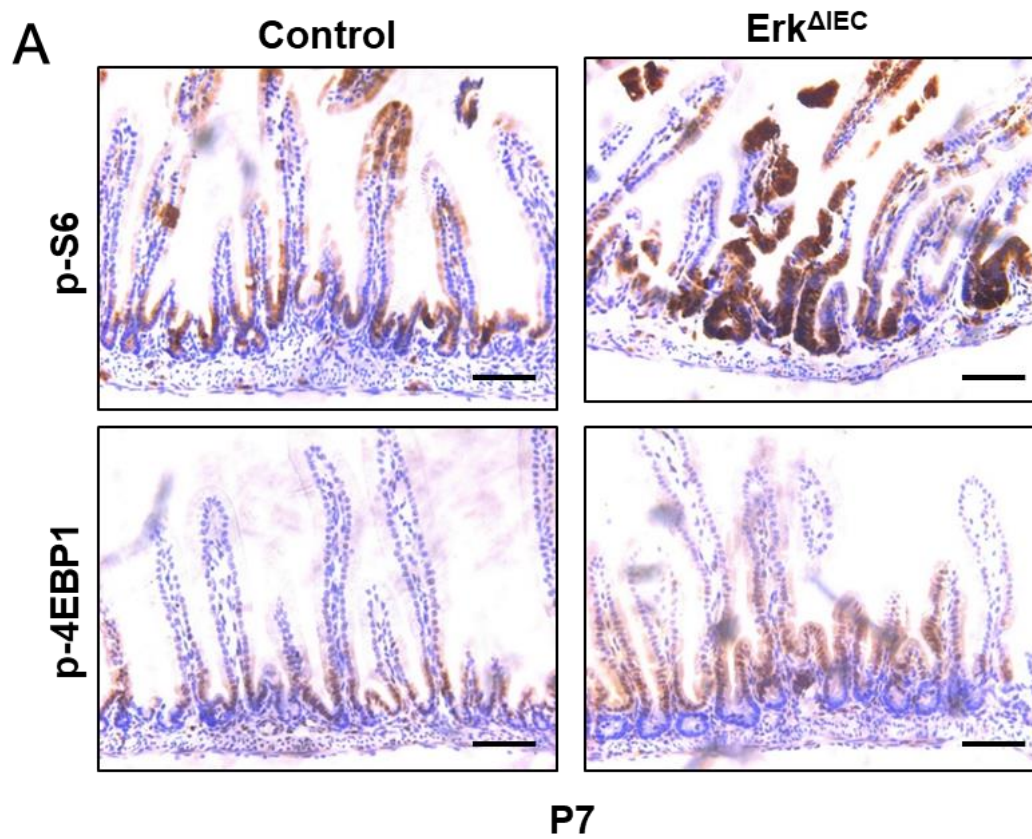

**Figure S5:** (A) Immunohistochemical analysis of p-S6 and p-4EBP1 in control and Erk mutant intestines at P7. (Scale bars: 50 $\mu$ m)

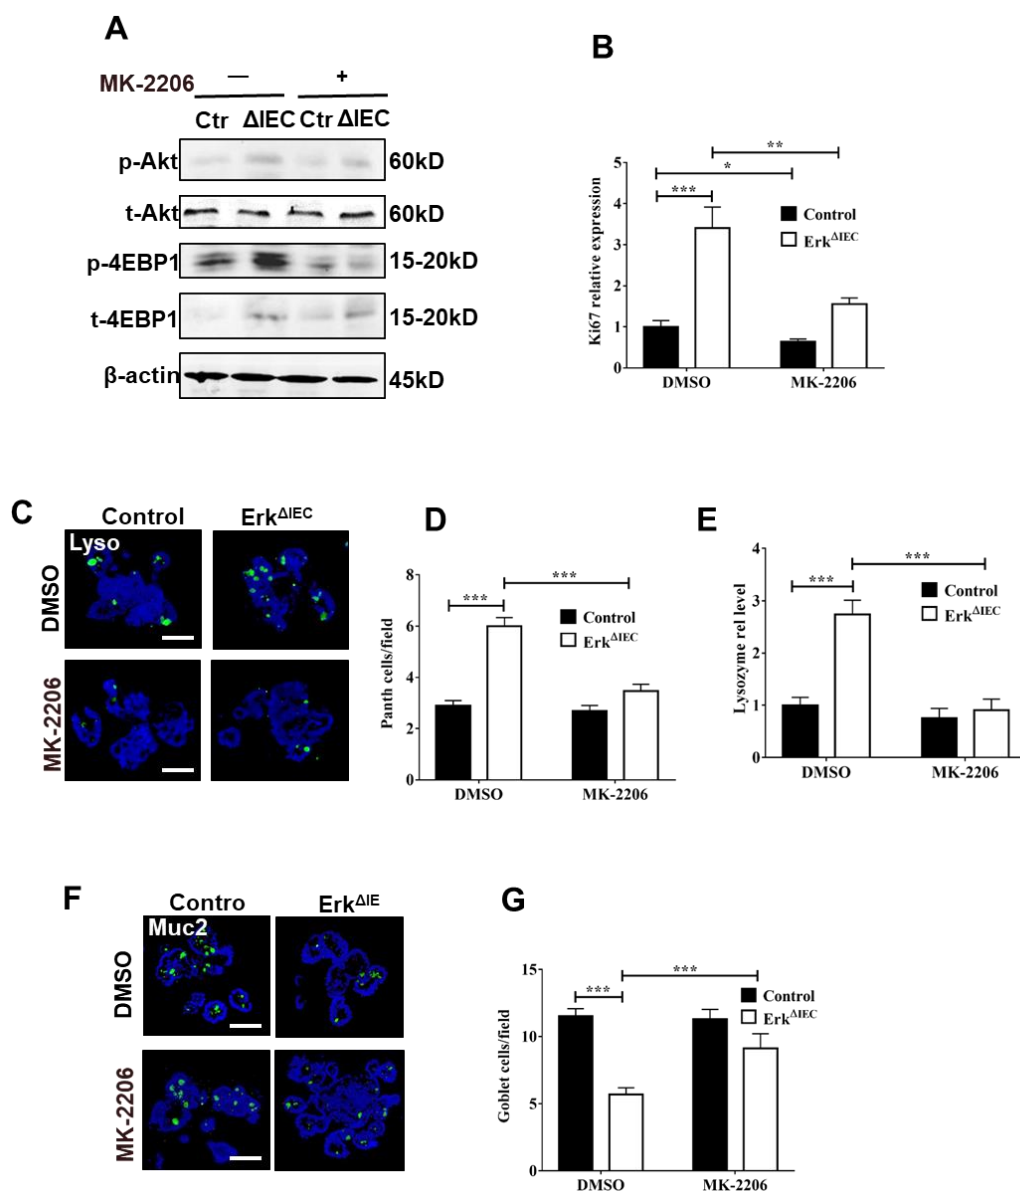

**Figure S6:** Akt inhibition through MK-2206 treatment rescued Erk1/2 depletion-induced cell differentiation defects ex vivo. (A) Treatment with MK-2206 inhibited Akt and 4EBP1 activity in Erk mutant mouse organoids. The protein level of p-Akt and p-4EBP1 was determined by Western blotting in intestinal organoid samples isolated from control and inhibitor treatment groups.  $\beta$ -actin was used as a loading control. (B) Quantitative real-time PCR analysis of Ki67 mRNA levels in intestinal organoid samples isolated from control and inhibitor treatment groups after 4 days of culture. Data are mean  $\pm$  SEM ( $n=3$ , \* $P<0.05$ ; \*\* $P<0.01$ ). (C-G) MK-2206 treatment rescued Erk1/2 deficiency-induced cell differentiation defects in intestinal organoid culture model. Immunofluorescent analysis for Lysozyme (C) and Muc2 (F) in

intestinal organoid samples isolated from control and inhibitor treatment groups after 4 days. Quantification of Paneth cells (D) and goblet cells (G) per field (n=3 mice per group and a total of 90 fields were analyzed for each genotype). (E) Quantitative real-time PCR analysis of Lysozyme mRNA levels in intestinal organoid samples isolated from control and inhibitor treatment groups after treatment for 4 days. Data are mean  $\pm$  SEM (n=3, \*P<0.05; \*\*P<0.01). (Scale bars: 100 $\mu$ m).
